# Supplementary material for: Estimation of rate coefficients and branching ratios for gas-phase reactions of OH with aromatic organic compounds for use in automated mechanism construction
Source: Copernicus journal article supplement (doi:10.5194/acp-18-9329-2018), 2018-07-04
Supplement: Supplementary file 1 [file acp-18-9329-2018-supplement.zip]

Archive with 4 entries (4 files):
- Supplement_aromatic.pdf
- SI_7_OH_aromatic oxygenate_preferred data.xls
- acp-18-9329-2018-supplement-title-page.pdf
- SI_6_OH_aromatic hydrocarbon_preferred data.xls
