# Supplementary material for: Estimation of rate coefficients and branching ratios for gas-phase reactions of OH with aromatic organic compounds for use in automated mechanism construction
Source: Copernicus journal article supplement (doi:10.5194/acp-18-9329-2018), 2018-07-04
Supplement: Supplementary file 1 [file acp-18-9329-2018-supplement.zip › SI_7_OH_aromatic oxygenate_preferred data.xls]

## Sheet: Notes
Pressure independent rate coefficients for OH + organic compounds
Rate coefficients in the form: k = A.exp(-E/RT) (i)
Notes on data table columns
Systematic name	systematic name of organic compound, usually based on IUPAC nomenclature
Alternative name	alternative/common names for organic compound
Carbon number	the number of carbon atoms in the organic compound
SMILES:	SMILES notation for organic compound				http://www.daylight.com/smiles/index.html
InChI:	InChI notation for organic compound				http://iupac.org/who-we-are/divisions/division-details/inchi/
k(298K):	rate coefficient at 298 K in cm3 molecule-1 s-1
A:	cm3 molecule-1 s-1
E/R:	K
Lower T	Lower bound of valid temperature range (K)
Upper T	Upper bound of valid temperature range (K)
Category:	E = evaluation; P = published; G = grey literature
Source	Source reference
Comment:	Any further information influencing the preferred value

## Sheet: References
References
Bejan et al. (2007)	Bejan, I., Barnes, I., Olariu, R., Zhou, S., Wiesen, P. and Benter, T: Investigations on the gas-phase photolysis and OH radical kinetics of methyl-2-nitrophenols, Phys. Chem. Chem. Phys., 9, 5686–5692, 2007.
Bejan et al. (2012)	Bejan, I., Schürmann, A., Barnes, I. and Benter, T. : Kinetics of the gas-phase reactions of OH radicals with a series of trimethylphenols, Int. J. Chem. Kinet., 44, 117-124, 2012.
Calvert et al. (2011)	Calvert, J. G., Mellouki, A., Orlando, J. J., Pilling, M. J. and Wallington, T. J.: The mechanisms of atmospheric oxidation of the oxygenates, Oxford University Press, Oxford. ISBN 978-0-19976707-6, 2011.
Clifford and Wenger (2006)	Clifford, G. M. and Wenger, J. C.: Rate coefficients for the gas-phase reaction of hydroxyl radicals with the dimethylbenzaldehydes, Int. J. Chem. Kinet., 38, 563–569, 2006.
IUPAC (Date)	IUPAC Task Group on Atmospheric Chemical Kinetic Data Evaluation, http://iupac.pole-ether.fr/ ("Date" indicates date of evaluation of specific reaction)
St. Clair et al. (2015)	St. Clair, J. M., Rivera-Rios, J. C., Crounse, J. D., Knap, H. C., Bates, K. H., Teng, A. P., Jørgensen, S., Kjaergaard, H. G., Keutsch, F. N. and Wennberg, P. O.: Kinetics and products of the reaction of the first-generation isoprene hydroxy hydroperoxide (ISOPOOH) with OH, J. Phys. Chem. A, 120 (9), 1441-1451, 2016.

## Sheet: alcohols
Systematic name	Aternative name	Carbon number	SMILES	InChI	Reagent	k(298K)	A	E/R	Lower T	Upper T	Category	Source	Comment	Calculated k(298K)
hydroxybenzenes
phenol		6	OC1=CC=CC=C1	1S/C6H6O/c7-6-4-2-1-3-5-6/h1-5,7H	OH	2.8e-11	4.7e-13	-1220	290	350	E	IUPAC (August 2008)		1.6004e-11
2-methylphenol	o-cresol	7	OC1=CC=CC=C1C	1S/C7H8O/c1-6-4-2-3-5-7(6)8/h2-5,8H,1H3	OH	4.1e-11	1.6e-12	-970	290	350	E	IUPAC (August 2008)		3.4171e-11
3-methylphenol	m-cresol	7	OC1=CC=CC(C)=C1	1S/C7H8O/c1-6-3-2-4-7(8)5-6/h2-5,8H,1H3	OH	5.9e-11	2.3e-12	-965	290	350	E	IUPAC (August 2008)		6.14726e-11
4-methylphenol	p-cresol	7	OC1=CC=C(C)C=C1	1S/C7H8O/c1-6-2-4-7(8)5-3-6/h2-5,8H,1H3	OH	4.9e-11	1.9e-12	-970	290	350	E	IUPAC (August 2008)		3.4171e-11
2,3-dimethylphenol		8	CC1=C(C)C(O)=CC=C1	1S/C8H10O/c1-6-4-3-5-8(9)7(6)2/h3-5,9H,1-2H3	OH	8.24e-11					E	Calvert et al. (2011)		7.69872e-11
2,4-dimethylphenol		8	CC1=CC(C)=CC=C1O	1S/C8H10O/c1-6-3-4-8(9)7(2)5-6/h3-5,9H,1-2H3	OH	7.32e-11					E	Calvert et al. (2011)		7.4038e-11
2,5-dimethylphenol		8	CC1=CC=C(C)C=C1O	1S/C8H10O/c1-6-3-4-7(2)8(9)5-6/h3-5,9H,1-2H3	OH	8.48e-11					E	Calvert et al. (2011)		7.69872e-11
2,6-dimethylphenol		8	CC1=CC=CC(C)=C1O	1S/C8H10O/c1-6-4-3-5-7(2)8(6)9/h3-5,9H,1-2H3	OH	6.67e-11					E	Calvert et al. (2011)		7.4038e-11
3,4-dimethylphenol		8	OC1=CC=C(C)C(C)=C1	1S/C8H10O/c1-6-3-4-8(9)5-7(6)2/h3-5,9H,1-2H3	OH	8.27e-11					E	Calvert et al. (2011)		7.69872e-11
3,5-dimethylphenol		8	OC1=CC(C)=CC(C)=C1	1S/C8H10O/c1-6-3-7(2)5-8(9)4-6/h3-5,9H,1-2H3	OH	1.14e-10					E	Calvert et al. (2011)		1.54142e-10
2,3,5-trimethylphenol		9	CC1=CC(C)=C(C)C(O)=C1	1S/C9H12O/c1-6-4-7(2)8(3)9(10)5-6/h4-5,10H,1-3H3	OH	1.48e-10					P	Bejan et al. (2012)		1.48656e-10
2,3,6-trimethylphenol		9	CC1=C(C)C(O)=C(C)C=C1	1S/C9H12O/c1-6-4-5-7(2)9(10)8(6)3/h4-5,10H,1-3H3	OH	1.35e-10					P	Bejan et al. (2012)		1.40022e-10
2,4,5-trimethylphenol		9	CC1=C(C)C=C(C)C(O)=C1	1S/C9H12O/c1-6-4-8(3)9(10)5-7(6)2/h4-5,10H,1-3H3	OH	1.23e-10					P	Bejan et al. (2012)		1.39123e-10
2,4,6-trimethylphenol		9	CC1=C(O)C(C)=CC(C)=C1	1S/C9H12O/c1-6-4-7(2)9(10)8(3)5-6/h4-5,10H,1-3H3	OH	1.67e-10					P	Bejan et al. (2012)		1.40861e-10
3,4,5-trimethylphenol		9	CC1=C(C)C(C)=CC(O)=C1	1S/C9H12O/c1-6-4-9(10)5-7(2)8(6)3/h4-5,10H,1-3H3	OH	1.55e-10					P	Bejan et al. (2012)		1.49414e-10
dihydroxybenzenes
1,2-dihydroxybenzene	benzene-1,2-diol, catechol	6	OC1=CC=CC=C1O	1S/C6H6O2/c7-5-3-1-2-4-6(5)8/h1-4,7-8H	OH	1e-10					E	IUPAC (November 2008)		8.31251e-11
1,2-dihydroxy-3-methylbenzene		7	CC1=C(O)C(O)=CC=C1	1S/C7H8O2/c1-5-3-2-4-6(8)7(5)9/h2-4,8-9H,1H3	OH	2e-10					E	IUPAC (November 2008)		1.85263e-10
1,2-dihydroxy-4-methylbenzene		7	OC1=CC(C)=CC=C1O	1S/C7H8O2/c1-5-2-3-6(8)7(9)4-5/h2-4,8-9H,1H3	OH	1.5e-10					E	IUPAC (November 2008)		1.85263e-10
phenyl alcohols
phenyl methanol	benzyl alcohol	7	OCC1=CC=CC=C1	1S/C7H8O/c8-6-7-4-2-1-3-5-7/h1-5,8H,6H2	OH	2.7e-11					E	IUPAC (June 2009)		2.67887e-11
		number of entries
		19

## Sheet: aldehydes
Systematic name	Aternative name	Carbon number	SMILES	InChI	Reagent	k(298K)	A	E/R	Lower T	Upper T	Category	Source	Comment	Calculated k(298K)
aldehydes
benzaldehyde		7	O=CC1=CC=CC=C1	1S/C7H6O/c8-6-7-4-2-1-3-5-7/h1-6H	OH	1.26e-11	5.9e-12	-225	290	350	E	IUPAC (June 2009)		1.26011e-11
o-tolualdehyde		8	O=CC1=C(C)C=CC=C1	1S/C8H8O/c1-7-4-2-3-5-8(7)6-9/h2-6H,1H3	OH	1.89e-11					E	Calvert et al. (2011)		1.93368e-11
m-tolualdehyde		8	O=CC1=CC(C)=CC=C1	1S/C8H8O/c1-7-3-2-4-8(5-7)6-9/h2-6H,1H3	OH	1.68e-11					E	Calvert et al. (2011)		1.82587e-11
p-tolualdehyde		8	O=CC1=CC=C(C)C=C1	1S/C8H8O/c1-7-2-4-8(6-9)5-3-7/h2-6H,1H3	OH	1.68e-11					E	Calvert et al. (2011)		1.72798e-11
2,3-dimethylbenzaldehyde		9	O=CC1=CC=CC(C)=C1C	1S/C9H10O/c1-7-4-3-5-9(6-10)8(7)2/h3-6H,1-2H3	OH	2.55e-11					E	Calvert et al. (2011)	Based on Clifford and Wenger (2006) data	2.70111e-11
2,4-dimethylbenzaldehyde		9	O=CC1=CC=C(C)C=C1C	1S/C9H10O/c1-7-3-4-9(6-10)8(2)5-7/h3-6H,1-2H3	OH	2.72e-11					E	Calvert et al. (2011)	Based on Clifford and Wenger (2006) data	2.65899e-11
2,5-dimethylbenzaldehyde		9	O=CC1=CC(C)=CC=C1C	1S/C9H10O/c1-7-3-4-8(2)9(5-7)6-10/h3-6H,1-2H3	OH	2.76e-11					E	Calvert et al. (2011)	Based on Clifford and Wenger (2006) data	2.70111e-11
2,6-dimethylbenzaldehyde		9	O=CC1=C(C)C=CC=C1C	1S/C9H10O/c1-7-4-3-5-8(2)9(7)6-10/h3-6H,1-2H3	OH	3.03e-11					E	Calvert et al. (2011)	Based on Clifford and Wenger (2006) data	2.96137e-11
3,4-dimethylbenzaldehyde		9	O=CC1=CC=C(C)C(C)=C1	1S/C9H10O/c1-7-3-4-9(6-10)5-8(7)2/h3-6H,1-2H3	OH	2.44e-11					E	Calvert et al. (2011)	Based on Clifford and Wenger (2006) data	2.4337e-11
3,5-dimethylbenzaldehyde		9	O=CC1=CC(C)=CC(C)=C1	1S/C9H10O/c1-7-3-8(2)5-9(4-7)6-10/h3-6H,1-2H3	OH	2.78e-11					E	Calvert et al. (2011)	Based on Clifford and Wenger (2006) data	2.6767e-11
dialdehydes/ketoaldehydes
1,2-diformylbenzene	phthaldialdehyde	8	O=CC1=CC=CC=C1C=O	1S/C8H6O2/c9-5-7-3-1-2-4-8(7)6-10/h1-6H	OH	2.3e-11					E	Calvert et al. (2011)	Based on Wang et al. (2006)	2.43151e-11
2-acetylbenzaldehyde		9	O=CC1=CC=CC=C1C(C)=O	1S/C9H8O2/c1-7(11)9-5-3-2-4-8(9)6-10/h2-6H,1H3	OH	1.7e-11					E	Calvert et al. (2011)	Based on Wang et al. (2006)	1.23451e-11
		number of entries
		12

## Sheet: ketones
Systematic name	Aternative name	Carbon number	SMILES	InChI	Reagent	k(298K)	A	E/R	Lower T	Upper T	Category	Source	Comment	Calculated k(298K)
diketones
1,2-diacetylbenzene		10	O=C(C1=CC=CC=C1C(C)=O)C	1S/C10H10O2/c1-7(11)9-5-3-4-6-10(9)8(2)12/h3-6H,1-2H3	OH	< 1.2E-12					P	Wang et al. (2006)		3.75089e-13
		number of entries
		1

## Sheet: ethers
Systematic name	Aternative name	Carbon number	SMILES	InChI	Reagent	k(298K)	A	E/R	Lower T	Upper T	Category	Source	Comment	Calculated k(298K)
alkoxybenzenes
methoxybenzene		7	COC1=CC=CC=C1	1S/C7H8O/c1-8-7-5-3-2-4-6-7/h2-6H,1H3	OH	1.8e-11	5.2e-12	-370	300	435	E	Calvert et al. (2011)		1.68556e-11
1,2-dimethoxybenzene		8	COC1=CC=CC=C1OC	1S/C8H10O2/c1-9-7-5-3-4-6-8(7)10-2/h3-6H,1-2H3	OH	3.6e-11					E	Calvert et al. (2011)		3.61428e-11
diphenyl ether		12	C1(OC2=CC=CC=C2)=CC=CC=C1	1S/C12H10O/c1-3-7-11(8-4-1)13-12-9-5-2-6-10-12/h1-10H	OH	8.2e-12					E	Calvert et al. (2011)		8.2368e-12
		number of entries
		3

## Sheet: esters
Systematic name	Aternative name	Carbon number	SMILES	InChI	Reagent	k(298K)	A	E/R	Lower T	Upper T	Category	Source	Comment	Calculated k(298K)
2-hydroxy-benzoic acid methyl ester	methyl salicylate	8	OC1=CC=CC=C1C(OC)=O	1S/C8H8O3/c1-11-8(10)6-4-2-3-5-7(6)9/h2-5,9H,1H3	OH	1.1e-11					E	Calvert et al. (2011)		1.10032e-11
		number of entries
		1

## Sheet: nitroarenes
Systematic name	Aternative name	Carbon number	SMILES	InChI	Reagent	k(298K)	A	E/R	Lower T	Upper T	Category	Source	Comment	Calculated k(298K)
nitrobenzenes
nitrobenzene		6	O=[N+](C1=CC=CC=C1)[O-]	1S/C6H5NO2/c8-7(9)6-4-2-1-3-5-6/h1-5H	OH	1.4e-13					E	Calvert et al. (2011)		1.6392e-13
1-methyl-3-nitrobenzene	m-nitrotoluene	7	O=[N+](C1=CC(C)=CC=C1)[O-]	1S/C7H7NO2/c1-6-3-2-4-7(5-6)8(9)10/h2-5H,1H3	OH	1.2e-12					E	Calvert et al. (2011)		1.00048e-12
nitrophenols
3-methyl-2-nitrophenol		7	O=[N+](C1=C(C)C=CC=C1O)[O-]	1S/C7H7NO3/c1-5-3-2-4-6(9)7(5)8(10)11/h2-4,9H,1H3	OH	3.69e-12					E	Bejan et al. (2007)		4.72745e-12
4-methyl-2-nitrophenol		7	O=[N+](C1=CC(C)=CC=C1O)[O-]	1S/C7H7NO3/c1-5-2-3-7(9)6(4-5)8(10)11/h2-4,9H,1H3	OH	3.59e-12					E	Bejan et al. (2007)		3.15503e-12
5-methyl-2-nitrophenol		7	O=[N+](C1=CC=C(C)C=C1O)[O-]	1S/C7H7NO3/c1-5-2-3-6(8(10)11)7(9)4-5/h2-4,9H,1H3	OH	6.72e-12					E	Bejan et al. (2007)		4.72745e-12
6-methyl-2-nitrophenol		7	O=[N+](C1=CC=CC(C)=C1O)[O-]	1S/C7H7NO3/c1-5-3-2-4-6(7(5)9)8(10)11/h2-4,9H,1H3	OH	2.7e-12					E	Bejan et al. (2007)		3.15503e-12
		number of entries
		6
