# Supplementary material for: Estimation of rate coefficients and branching ratios for gas-phase reactions of OH with aromatic organic compounds for use in automated mechanism construction
Source: Copernicus journal article supplement (doi:10.5194/acp-18-9329-2018), 2018-07-04
Supplement: Supplementary file 1 [file acp-18-9329-2018-supplement.zip › Supplement_aromatic.pdf]

## **Supplementary Material for:**

**Estimation of rate coefficients and branching ratios for gas-phase reactions of OH with aromatic organic compounds for use in automated mechanism construction**

---

### **Contents**

|           |                                                             |           |
|-----------|-------------------------------------------------------------|-----------|
| <b>S1</b> | <b>Observed and estimated temperature coefficients</b>      | <b>2</b>  |
| <b>S2</b> | <b>Comparison of observed and calculated product yields</b> | <b>3</b>  |
| <b>S3</b> | <b>Phenol and cresols</b>                                   | <b>5</b>  |
| <b>S4</b> | <b>Benzaldehydes</b>                                        | <b>7</b>  |
| <b>S5</b> | <b>OH + aromatic SAR application examples for 298 K</b>     | <b>9</b>  |
| <b>S6</b> | <b>Toluene oxidation sequence example calculations</b>      | <b>14</b> |
|           | <b>References</b>                                           | <b>18</b> |

---

## S1 Observed and estimated temperature coefficients

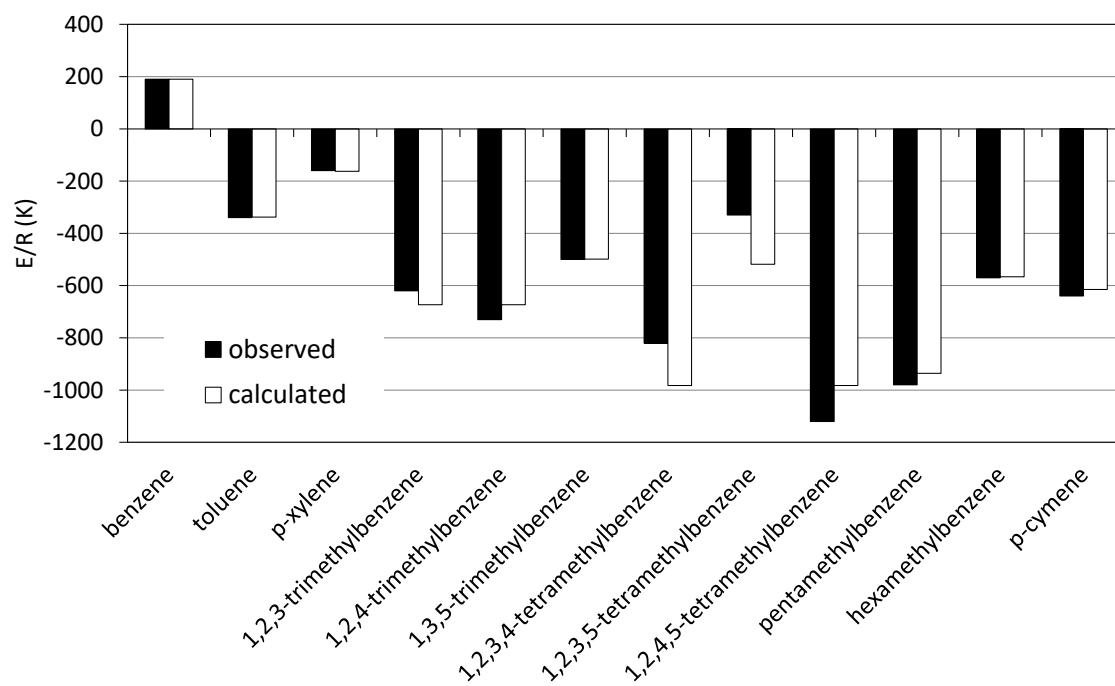

**Figure S1.** Comparison of observed (recommended) temperature coefficients ( $E/R$ ) for the reactions of OH with benzene, 10 methyl-substituted aromatics and p-cymene, compared with those estimated or assigned in the present work.

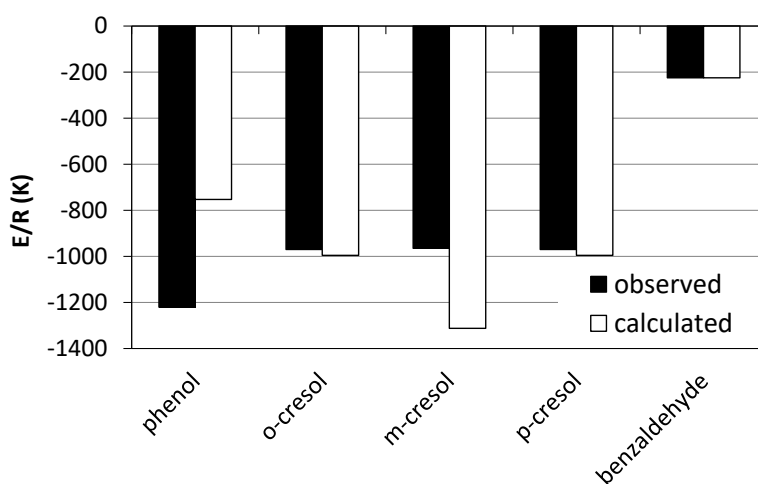

**Figure S2.** Comparison of observed (recommended) temperature coefficients ( $E/R$ ) for the reactions of OH with phenol, cresols and benzaldehyde, compared with those estimated in the present work.

## S2 Comparison of observed and calculated product yields

Tables S1 and S2 summarize observed and calculated yields of a number of reported first-generation end products and promptly-formed HO<sub>2</sub> radicals, from the OH-initiated oxidation of benzene and methyl-substituted aromatics. These data are also presented as a correlation plot in Fig. 5 of the main paper.

**Table S1.** Comparison of estimated and reported yields of hydroxyarene (phenolic) products at 298 K.

| Compound                                                                                                                                                                                                                                                                                                                                                                                     | Product              | Yield         |                       | Comment |
|----------------------------------------------------------------------------------------------------------------------------------------------------------------------------------------------------------------------------------------------------------------------------------------------------------------------------------------------------------------------------------------------|----------------------|---------------|-----------------------|---------|
|                                                                                                                                                                                                                                                                                                                                                                                              |                      | calculated    | observed              |         |
| benzene                                                                                                                                                                                                                                                                                                                                                                                      | phenol               | 53.3 %        | (54.2 ± 3.2) %        | (a)     |
| toluene                                                                                                                                                                                                                                                                                                                                                                                      | <i>o</i> -cresol     | 12.2 %        | (12.2 ± 0.9) %        | (b)     |
|                                                                                                                                                                                                                                                                                                                                                                                              | <i>m</i> -cresol     | 3.7 %         | (2.7 ± 0.4) %         |         |
|                                                                                                                                                                                                                                                                                                                                                                                              | <i>p</i> -cresol     | 3.3 %         | (3.0 ± 0.3) %         |         |
|                                                                                                                                                                                                                                                                                                                                                                                              | <b>total</b>         | <b>19.2 %</b> | <b>(17.9 ± 1.6) %</b> |         |
| <i>m</i> -xylene                                                                                                                                                                                                                                                                                                                                                                             | 2,4-dimethyphenol    | 3.0 %         | (6.0 ± 0.4) %         | (c)     |
|                                                                                                                                                                                                                                                                                                                                                                                              | 2,6-dimethyphenol    | 5.8 %         | (4.6 ± 0.3) %         |         |
|                                                                                                                                                                                                                                                                                                                                                                                              | 3,5-dimethyphenol    | 1.8 %         | (0.3 ± 0.03) %        |         |
|                                                                                                                                                                                                                                                                                                                                                                                              | <b>total</b>         | <b>10.6 %</b> | <b>(10.9 ± 0.7) %</b> |         |
| <i>p</i> -xylene                                                                                                                                                                                                                                                                                                                                                                             | 2,5-dimethyphenol    | 10.9 %        | (13.0 ± 1.8) %        | (c)     |
| 1,2,4-trimethylbenzene                                                                                                                                                                                                                                                                                                                                                                       | 2,3,6-trimethyphenol | 2.4 %         | (1.4 ± 0.2) %         | (c),(d) |
|                                                                                                                                                                                                                                                                                                                                                                                              | 2,4,5-trimethyphenol | 0.6 %         | (0.26 ± 0.04) %       |         |
|                                                                                                                                                                                                                                                                                                                                                                                              | 2,3,5-trimethyphenol | 0.8 %         | (0.5 ± 0.2) %         |         |
|                                                                                                                                                                                                                                                                                                                                                                                              | <b>total</b>         | <b>3.8 %</b>  | <b>(2.2 ± 0.4) %</b>  |         |
| 1,3,5-trimethylbenzene                                                                                                                                                                                                                                                                                                                                                                       | 2,4,6-trimethyphenol | 3.2 %         | (4.0 ± 1.0) %         | (c),(d) |
| <b>Comments</b>                                                                                                                                                                                                                                                                                                                                                                              |                      |               |                       |         |
| <sup>a</sup> Observed value based on a weighted average of the yields reported by Volkamer et al. (2002), Berndt and Böge (2006) and Noda et al. (2009); <sup>b</sup> Observed values based on averages of the yields reported by Smith et al. (1998) and Klotz et al. (1998); <sup>c</sup> Observed values based on Smith et al. (1999); <sup>d</sup> Reported as tentative identification. |                      |               |                       |         |

**Table S2.** Comparison of estimated and reported yields of α-dicarbonyls, nitrates and prompt HO<sub>2</sub> at 298 K.

| Compound         | Product                                     | Branching ratio |                        | Comment |
|------------------|---------------------------------------------|-----------------|------------------------|---------|
|                  |                                             | calculated      | observed               |         |
| benzene          | glyoxal<br>(and <b>total α-dicarbonyl</b> ) | <b>29.8 %</b>   | <b>(35.0 ± 10.0) %</b> | (a)     |
|                  | nitrate                                     | 2.9 %           | 3.4 %                  | (b)     |
|                  | HO <sub>2</sub>                             | 67.3 %          | (69 ± 10) %            | (c)     |
| toluene          | glyoxal                                     | 25.4 %          | (26.0 ± 2.2) %         | (d)     |
|                  | methylglyoxal                               | 23.4 %          | (21.5 ± 2.9) %         |         |
|                  | <b>total α-dicarbonyl</b>                   | <b>48.8 %</b>   | <b>(47.5 ± 5.1) %</b>  |         |
|                  | nitrate                                     | 3.4 %           | 2.9 %                  | (b)     |
| <i>o</i> -xylene | HO <sub>2</sub>                             | 41.5 %          | (42 ± 11) %            | (e)     |
|                  | glyoxal                                     | 19.0 %          | (12.7 ± 1.9) %         | (d),(f) |
|                  | methylglyoxal                               | 22.4 %          | (33.1 ± 6.1) %         |         |
|                  | biacetyl                                    | 15.1 %          | (18.5 ± 2.8) %         |         |
|                  | <b>total α-dicarbonyl</b>                   | <b>56.5 %</b>   | <b>(64.3 ± 10.8) %</b> |         |
| <i>o</i> -xylene | HO <sub>2</sub>                             | 33.3 %          | (41 ± 8) %             | (e)     |

**Table S2 (continued).** Comparison of estimated and reported yields of  $\alpha$ -dicarbonyls, nitrates and prompt HO<sub>2</sub> at 298 K.

| Compound                                                                                                                                                                                                                                                                                                                                                                                                                                                                                                                                                                                   | Product                                                             | Branching ratio |                        | Comment |
|--------------------------------------------------------------------------------------------------------------------------------------------------------------------------------------------------------------------------------------------------------------------------------------------------------------------------------------------------------------------------------------------------------------------------------------------------------------------------------------------------------------------------------------------------------------------------------------------|---------------------------------------------------------------------|-----------------|------------------------|---------|
|                                                                                                                                                                                                                                                                                                                                                                                                                                                                                                                                                                                            |                                                                     | calculated      | observed               |         |
| <i>m</i> -xylene                                                                                                                                                                                                                                                                                                                                                                                                                                                                                                                                                                           | glyoxal                                                             | 11.9 %          | (11.4 ± 0.7) %         | (d)     |
|                                                                                                                                                                                                                                                                                                                                                                                                                                                                                                                                                                                            | methylglyoxal                                                       | 45.7 %          | (51.5 ± 8.5) %         |         |
|                                                                                                                                                                                                                                                                                                                                                                                                                                                                                                                                                                                            | <b>total <math>\alpha</math>-dicarbonyl</b>                         | <b>57.6 %</b>   | <b>(62.9 ± 9.2) %</b>  |         |
|                                                                                                                                                                                                                                                                                                                                                                                                                                                                                                                                                                                            | HO <sub>2</sub>                                                     | 36.5 %          | (27 ± 6) %             | (e)     |
| <i>p</i> -xylene                                                                                                                                                                                                                                                                                                                                                                                                                                                                                                                                                                           | glyoxal                                                             | 35.0 %          | (38.9 ± 4.7) %         | (d)     |
|                                                                                                                                                                                                                                                                                                                                                                                                                                                                                                                                                                                            | methylglyoxal                                                       | 19.1 %          | (18.7 ± 2.2) %         |         |
|                                                                                                                                                                                                                                                                                                                                                                                                                                                                                                                                                                                            | <b>total <math>\alpha</math>-dicarbonyl</b>                         | <b>54.1 %</b>   | <b>(57.6 ± 6.9) %</b>  |         |
|                                                                                                                                                                                                                                                                                                                                                                                                                                                                                                                                                                                            | nitrate                                                             | 2.5 %           | 2.5 %                  | (b)     |
|                                                                                                                                                                                                                                                                                                                                                                                                                                                                                                                                                                                            | HO <sub>2</sub>                                                     | 35.2 %          | (40 ± 9) %             | (e)     |
| 1,2,3-trimethylbenzene                                                                                                                                                                                                                                                                                                                                                                                                                                                                                                                                                                     | glyoxal                                                             | 4.7 %           | (4.7 ± 2.4) %          | (d),(f) |
|                                                                                                                                                                                                                                                                                                                                                                                                                                                                                                                                                                                            | methylglyoxal                                                       | 24.5 %          | (15.1 ± 3.3) %         |         |
|                                                                                                                                                                                                                                                                                                                                                                                                                                                                                                                                                                                            | biacetyl                                                            | 34.0 %          | (44.4 ± 5.3) %         |         |
|                                                                                                                                                                                                                                                                                                                                                                                                                                                                                                                                                                                            | <b>total <math>\alpha</math>-dicarbonyl</b>                         | <b>63.1 %</b>   | <b>(64.2 ± 11.0) %</b> |         |
|                                                                                                                                                                                                                                                                                                                                                                                                                                                                                                                                                                                            | HO <sub>2</sub>                                                     | 29.1 %          | (31 ± 6) %             | (e)     |
| 1,2,4-trimethylbenzene                                                                                                                                                                                                                                                                                                                                                                                                                                                                                                                                                                     | glyoxal                                                             | 13.2 %          | (8.7 ± 1.6) %          | (d),(f) |
|                                                                                                                                                                                                                                                                                                                                                                                                                                                                                                                                                                                            | methylglyoxal                                                       | 32.3 %          | (27.2 ± 8.1) %         |         |
|                                                                                                                                                                                                                                                                                                                                                                                                                                                                                                                                                                                            | biacetyl                                                            | 15.6 %          | (11.4 ± 2.4) %         |         |
|                                                                                                                                                                                                                                                                                                                                                                                                                                                                                                                                                                                            | <b>total <math>\alpha</math>-dicarbonyl</b>                         | <b>61.1 %</b>   | <b>(47.3 ± 12.1) %</b> |         |
|                                                                                                                                                                                                                                                                                                                                                                                                                                                                                                                                                                                            | HO <sub>2</sub>                                                     | 30.7 %          | (37 ± 9) %             | (e)     |
| 1,3,5-trimethylbenzene                                                                                                                                                                                                                                                                                                                                                                                                                                                                                                                                                                     | methylglyoxal<br>(and <b>total <math>\alpha</math>-dicarbonyl</b> ) | <b>63.9 %</b>   | <b>(58.1 ± 5.3) %</b>  | (d)     |
|                                                                                                                                                                                                                                                                                                                                                                                                                                                                                                                                                                                            | nitrate                                                             | 2.6 %           | 2.7 %                  | (g)     |
|                                                                                                                                                                                                                                                                                                                                                                                                                                                                                                                                                                                            | HO <sub>2</sub>                                                     | 31.7 %          | (29 ± 8) %             | (e)     |
| hexamethylbenzene                                                                                                                                                                                                                                                                                                                                                                                                                                                                                                                                                                          | biacetyl<br>(and <b>total <math>\alpha</math>-dicarbonyl</b> )      | <b>55.0 %</b>   | -                      | -       |
|                                                                                                                                                                                                                                                                                                                                                                                                                                                                                                                                                                                            | HO <sub>2</sub>                                                     | 28.0 %          | (32 ± 8) %             | (e)     |
| <b>Comments</b><br><sup>a</sup> Observed value taken from Volkamer et al. (2001); <sup>b</sup> Observed values based on Elrod (2011); <sup>c</sup> Observed value taken from Nehr et al. (2011); <sup>d</sup> Observed values for glyoxal and methylglyoxal taken from Nishino et al. (2010); <sup>e</sup> Observed value taken from Nehr et al. (2012); <sup>f</sup> Observed values for biacetyl taken from Atkinson and Aschmann (1994) and Smith et al. (1999); <sup>g</sup> Observed value is total peroxide-bicyclic nitrate yield, based on Rickard et al. (2010) and Elrod (2011). |                                                                     |                 |                        |         |

### S3 Phenol and cresols

As discussed in Sect. 3.2.1 of the main paper, the attack distributions predicted by the optimized parameters recreate some of the features inferred from reported experimental studies for phenol and cresols, but tend to underestimate the dominant *ortho*- directing effect inferred from reported product studies. It is generally recommended that attack distributions (and rate coefficients) based on the results of experimental studies are applied where evaluated information is available. Table S3 presents recommendations for phenol and the cresol isomers, informed by the product studies of Atkinson et al. (1992), Olariu et al. (2002) and Couer-Tourneur et al. (2006) each of which reports data for a series of phenolic compounds.

**Table S3.** Calculated and recommended branching ratios and rate coefficients ( $k$ ) for OH attack for phenol and the cresol isomers at 298 K.

| Attack site                                                                  | Degeneracy | Branching ratios |              |         |
|------------------------------------------------------------------------------|------------|------------------|--------------|---------|
|                                                                              |            | Calculated       | Recommended  | Comment |
| <b>1) phenol</b>                                                             |            |                  |              |         |
| <i>ortho</i> - OH(1)                                                         | 2          | 0.474            | <b>0.804</b> | (a),(b) |
| <i>meta</i> - OH(2)                                                          | 2          | 0.084            | 0.017        | (c)     |
| <i>para</i> - OH (3)                                                         | 1          | 0.237            | <b>0.107</b> | (a),(d) |
| <i>ipso</i> - OH (4)                                                         | 1          | 0.042            | 0.009        | (c)     |
| abstraction -OH (5)                                                          | 1          | 0.162            | <b>0.063</b> | (a),(e) |
|                                                                              |            |                  |              |         |
| $10^{12} \times k$ (cm <sup>3</sup> molecule <sup>-1</sup> s <sup>-1</sup> ) |            | 16.0             | 28.0         |         |
|                                                                              |            |                  |              |         |
| <b>2) o-cresol</b>                                                           |            |                  |              |         |
| <i>ortho</i> - OH, <i>meta</i> - CH <sub>3</sub> (1)                         | 1          | 0.160            | <b>0.734</b> | (a),(b) |
| <i>ortho</i> - OH, <i>ipso</i> - CH <sub>3</sub> (2)                         | 1          | 0.156            | -            | (f)     |
| <i>meta</i> - OH, <i>para</i> - CH <sub>3</sub> (3)                          | 1          | 0.147            | -            | (f)     |
| <i>meta</i> - OH, <i>ortho</i> - CH <sub>3</sub> (4)                         | 1          | 0.147            | -            | (f)     |
| <i>para</i> - OH, <i>meta</i> - CH <sub>3</sub> (5)                          | 1          | 0.160            | <b>0.198</b> | (a),(d) |
| <i>ipso</i> - OH, <i>ortho</i> - CH <sub>3</sub> (6)                         | 1          | 0.144            | -            | (f)     |
| abstraction -OH (7)                                                          | 1          | 0.076            | <b>0.058</b> | (a),(e) |
| abstraction -CH <sub>3</sub> (8)                                             | 1          | 0.010            | 0.010        | (g)     |
|                                                                              |            |                  |              |         |
| $10^{12} \times k$ (cm <sup>3</sup> molecule <sup>-1</sup> s <sup>-1</sup> ) |            | 34.2             | 41.0         |         |
|                                                                              |            |                  |              |         |
| <b>3) m-cresol</b>                                                           |            |                  |              |         |
| <i>ortho</i> - OH, <i>para</i> - CH <sub>3</sub> (1)                         | 1          | 0.288            | <b>0.097</b> | (a),(b) |
| <i>ortho</i> - OH, <i>ortho</i> - CH <sub>3</sub> (2)                        | 1          | 0.288            | <b>0.686</b> | (a),(b) |
| <i>meta</i> - OH, <i>meta</i> - CH <sub>3</sub> (3)                          | 1          | 0.059            | -            | (c)     |
| <i>meta</i> - OH, <i>ipso</i> - CH <sub>3</sub> (4)                          | 1          | 0.015            | -            | (c)     |
| <i>para</i> - OH, <i>ortho</i> - CH <sub>3</sub> (5)                         | 1          | 0.288            | <b>0.176</b> | (a),(h) |
| <i>ipso</i> - OH, <i>meta</i> - CH <sub>3</sub> (6)                          | 1          | 0.015            | -            | (c)     |
| abstraction -OH (7)                                                          | 1          | 0.042            | <b>0.035</b> | (a),(e) |
| abstraction -CH <sub>3</sub> (8)                                             | 1          | 0.006            | 0.006        | (g)     |
|                                                                              |            |                  |              |         |
| $10^{12} \times k$ (cm <sup>3</sup> molecule <sup>-1</sup> s <sup>-1</sup> ) |            | 61.5             | 59.0         |         |

**Table S3 (continued).** Calculated and recommended branching ratios and rate coefficients (*k*) for OH attack for phenol and the cresol isomers at 298 K.

| Attack site                                                                                                                                                                                                                                                                                                                                                                                                                                                                                                                                                                                                                                                                                                                                                                                                                                                                                                                                                                                                                                                                                                                      | Degeneracy | Branching ratios |             |         |
|----------------------------------------------------------------------------------------------------------------------------------------------------------------------------------------------------------------------------------------------------------------------------------------------------------------------------------------------------------------------------------------------------------------------------------------------------------------------------------------------------------------------------------------------------------------------------------------------------------------------------------------------------------------------------------------------------------------------------------------------------------------------------------------------------------------------------------------------------------------------------------------------------------------------------------------------------------------------------------------------------------------------------------------------------------------------------------------------------------------------------------|------------|------------------|-------------|---------|
|                                                                                                                                                                                                                                                                                                                                                                                                                                                                                                                                                                                                                                                                                                                                                                                                                                                                                                                                                                                                                                                                                                                                  |            | Calculated       | Recommended | Comment |
| 4) <i>p</i> -cresol                                                                                                                                                                                                                                                                                                                                                                                                                                                                                                                                                                                                                                                                                                                                                                                                                                                                                                                                                                                                                                                                                                              |            |                  |             |         |
| <i>ortho</i> - OH, <i>meta</i> - CH <sub>3</sub> (1)                                                                                                                                                                                                                                                                                                                                                                                                                                                                                                                                                                                                                                                                                                                                                                                                                                                                                                                                                                                                                                                                             | 2          | 0.320            | 0.641       | (a),(b) |
| <i>meta</i> - OH, <i>ortho</i> - CH <sub>3</sub> (2)                                                                                                                                                                                                                                                                                                                                                                                                                                                                                                                                                                                                                                                                                                                                                                                                                                                                                                                                                                                                                                                                             | 2          | 0.295            | 0.130       | (c)     |
| <i>para</i> - OH, <i>ipso</i> - CH <sub>3</sub> (3)                                                                                                                                                                                                                                                                                                                                                                                                                                                                                                                                                                                                                                                                                                                                                                                                                                                                                                                                                                                                                                                                              | 1          | 0.156            | 0.068       | (c)     |
| <i>ipso</i> - OH, <i>para</i> - CH <sub>3</sub> (4)                                                                                                                                                                                                                                                                                                                                                                                                                                                                                                                                                                                                                                                                                                                                                                                                                                                                                                                                                                                                                                                                              | 1          | 0.144            | 0.063       | (c)     |
| abstraction -OH (5)                                                                                                                                                                                                                                                                                                                                                                                                                                                                                                                                                                                                                                                                                                                                                                                                                                                                                                                                                                                                                                                                                                              | 1          | 0.076            | 0.088       | (a),(e) |
| abstraction -CH <sub>3</sub> (6)                                                                                                                                                                                                                                                                                                                                                                                                                                                                                                                                                                                                                                                                                                                                                                                                                                                                                                                                                                                                                                                                                                 | 1          | 0.010            | 0.010       | (g)     |
|                                                                                                                                                                                                                                                                                                                                                                                                                                                                                                                                                                                                                                                                                                                                                                                                                                                                                                                                                                                                                                                                                                                                  |            |                  |             |         |
| 10 <sup>12</sup> × <i>k</i> (cm <sup>3</sup> molecule <sup>-1</sup> s <sup>-1</sup> )                                                                                                                                                                                                                                                                                                                                                                                                                                                                                                                                                                                                                                                                                                                                                                                                                                                                                                                                                                                                                                            |            | 34.2             | 49.0        |         |
|                                                                                                                                                                                                                                                                                                                                                                                                                                                                                                                                                                                                                                                                                                                                                                                                                                                                                                                                                                                                                                                                                                                                  |            |                  |             |         |
| <div><div>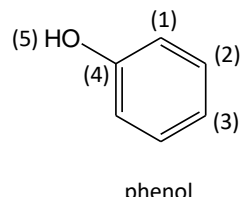<p>phenol</p></div><div>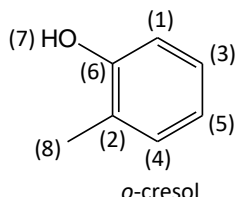<p><i>o</i>-cresol</p></div><div>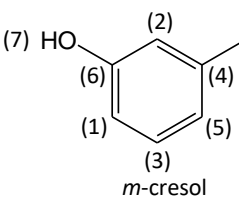<p><i>m</i>-cresol</p></div><div>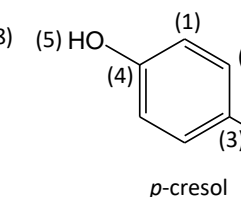<p><i>p</i>-cresol</p></div></div>                                                                                                                                                                                                                                                                                                                                                                                                                                                                                                                                                                                                                                                    |            |                  |             |         |
| <b>Comments</b><br><sup>a</sup> Contribution (shown in red font) inferred from reported product yields (Atkinson et al., 1992; Olariu et al., 2002; Couer-Tourneur et al., 2006);<br><sup>b</sup> Based on reported yield of corresponding catechol product;<br><sup>c</sup> Contributions of these (minor) channels retain the calculated relative importance, but with their absolute contributions reduced to account for the residual not covered by (b), (d), (e) and (g);<br><sup>d</sup> Based on reported yield of corresponding benzoquinone product, which is partially produced from the subsequent chemistry;<br><sup>e</sup> Based on reported yield of corresponding 2-nitrophenol product;<br><sup>f</sup> Assigned zero value, because full reaction is accounted for by product yields reported for other channels;<br><sup>g</sup> Calculated contribution retained for abstraction from the CH <sub>3</sub> group;<br><sup>h</sup> Assigned branching ratio leads to underestimated formation of methyl-1,4-benzoquinone from subsequent chemistry, but is set at residual yield not covered by other routes. |            |                  |             |         |

## S4 Benzaldehydes

**Table S4.** Values of  $k_{\text{abs(Ph-C(O)H)}}$  and  $R_{\text{C(O)H}}(\Phi)$  at 298 K, optimized from the preferred data for benzaldehydes and methyl-substituted benzaldehydes, based on different assumptions. Method B is adopted (see Sect. 3.2.2 of the main paper).

|                                                                                                                                                                                                                                                                                                                                                                                                                                                                                                                                                                                                                                                                                                                                                                                                                                                                                                                                                                                                                                                                                                                                                                                                                                                                                                                                                                                                                                                                                                              | $10^{12} \times k_{\text{abs(Ph-C(O)H)}}$          | $R_{\text{C(O)H}}(o-)$ | $R_{\text{C(O)H}}(p-)$ | $R_{\text{C(O)H}}(m-)$ | $R_{\text{C(O)H}}(ipso-)$ | comment |
|--------------------------------------------------------------------------------------------------------------------------------------------------------------------------------------------------------------------------------------------------------------------------------------------------------------------------------------------------------------------------------------------------------------------------------------------------------------------------------------------------------------------------------------------------------------------------------------------------------------------------------------------------------------------------------------------------------------------------------------------------------------------------------------------------------------------------------------------------------------------------------------------------------------------------------------------------------------------------------------------------------------------------------------------------------------------------------------------------------------------------------------------------------------------------------------------------------------------------------------------------------------------------------------------------------------------------------------------------------------------------------------------------------------------------------------------------------------------------------------------------------------|----------------------------------------------------|------------------------|------------------------|------------------------|---------------------------|---------|
|                                                                                                                                                                                                                                                                                                                                                                                                                                                                                                                                                                                                                                                                                                                                                                                                                                                                                                                                                                                                                                                                                                                                                                                                                                                                                                                                                                                                                                                                                                              | $\text{cm}^3 \text{ molecule}^{-1} \text{ s}^{-1}$ |                        |                        |                        |                           |         |
| A                                                                                                                                                                                                                                                                                                                                                                                                                                                                                                                                                                                                                                                                                                                                                                                                                                                                                                                                                                                                                                                                                                                                                                                                                                                                                                                                                                                                                                                                                                            | 10.8                                               | 0.25                   | 0.25                   | 0.78                   | 0.78                      | (a)     |
| <b>B</b>                                                                                                                                                                                                                                                                                                                                                                                                                                                                                                                                                                                                                                                                                                                                                                                                                                                                                                                                                                                                                                                                                                                                                                                                                                                                                                                                                                                                                                                                                                     | <b>12.1</b>                                        | <b>0.096</b>           | <b>0.096</b>           | <b>0.096</b>           | <b>0.096</b>              | (b)     |
| C                                                                                                                                                                                                                                                                                                                                                                                                                                                                                                                                                                                                                                                                                                                                                                                                                                                                                                                                                                                                                                                                                                                                                                                                                                                                                                                                                                                                                                                                                                            | 12.6                                               | 0                      | 0                      | 0                      | 0                         | (c)     |
| <b>Comments</b><br><sup>a</sup> Constant value of $k_{\text{abs(Ph-C(O)H)}}$ , assumed to be unaffected by the presence of methyl substituents on the aromatic ring. Its value, and those of $R_{\text{C(O)H}}(\Phi)$ , optimized using data for benzaldehyde and methyl-substituted benzaldehydes;<br><sup>b</sup> Adopted methodology (see Sect. 3.2.2 of main paper). Reference value of $k_{\text{abs(Ph-C(O)H)}}$ set to account for 96 % of the preferred rate coefficient for benzaldehyde, consistent with DFT study of Iuga et al. (2008). Strongly deactivating values of $R_{\text{C(O)H}}(\Phi)$ optimized so that OH addition accounts for the remaining 4 % of the reaction, with all factors assumed equivalent. Additional activating influence of methyl substituents on $k_{\text{abs(Ph-C(O)H)}}$ optimized using data for methyl-substituted benzaldehydes, leading to enhancement factors of 1.47, 1.30 and 1.30 for methyl groups positioned <i>ortho</i> -, <i>meta</i> - and <i>para</i> - to the -C(=O)H group, respectively;<br><sup>c</sup> OH addition to the aromatic ring assumed to be completely deactivated by the presence of a -C(O)H substituent. Additional activating influence of methyl substituents on $k_{\text{abs(Ph-C(O)H)}}$ optimized using data for methyl-substituted benzaldehydes, leading to enhancement factors of 1.51, 1.40 and 1.34 for methyl groups positioned <i>ortho</i> -, <i>meta</i> - and <i>para</i> - to the -C(=O)H group, respectively. |                                                    |                        |                        |                        |                           |         |

**Table S5.** Rate coefficients (in  $\text{cm}^3 \text{ molecule}^{-1} \text{ s}^{-1}$ ) and -C(O)H abstraction contributions calculated with methods A, B and C (as described in Table S4) for benzaldehyde and related compounds at 298 K.

| Compound                                                                                                                                                                                                                                      | $10^{12} k_{\text{obs}}$ | $10^{12} k_{\text{calc}}$ |             |      | abstraction from -C(O)H |                |                |
|-----------------------------------------------------------------------------------------------------------------------------------------------------------------------------------------------------------------------------------------------|--------------------------|---------------------------|-------------|------|-------------------------|----------------|----------------|
|                                                                                                                                                                                                                                               |                          | A                         | B           | C    | A                       | B              | C              |
| benzaldehyde                                                                                                                                                                                                                                  | 12.6                     | 12.6                      | <b>12.6</b> | 12.6 | 0.861                   | <b>0.960</b>   | 1.000          |
| <i>o</i> -tolualdehyde                                                                                                                                                                                                                        | 18.9                     | 17.6                      | <b>19.3</b> | 19.4 | 0.614                   | <b>0.920</b>   | 0.982          |
| <i>m</i> -tolualdehyde                                                                                                                                                                                                                        | 16.8                     | 18.0                      | <b>18.3</b> | 18.0 | 0.599                   | <b>0.862</b>   | 0.980          |
| <i>p</i> -tolualdehyde                                                                                                                                                                                                                        | 16.8                     | 17.6                      | <b>17.3</b> | 17.2 | 0.614                   | <b>0.910</b>   | 0.980          |
| 2,3-dimethylbenzaldehyde                                                                                                                                                                                                                      | 25.5                     | 23.4                      | <b>27.0</b> | 27.8 | 0.461                   | <b>0.856</b>   | 0.960          |
| 2,4-dimethylbenzaldehyde                                                                                                                                                                                                                      | 27.2                     | 29.7                      | <b>26.6</b> | 26.2 | 0.364                   | <b>0.870</b>   | 0.973          |
| 2,5-dimethylbenzaldehyde                                                                                                                                                                                                                      | 27.6                     | 23.4                      | <b>27.0</b> | 27.8 | 0.461                   | <b>0.856</b>   | 0.960          |
| 2,6-dimethylbenzaldehyde                                                                                                                                                                                                                      | 30.3                     | 29.7                      | <b>29.6</b> | 29.4 | 0.364                   | <b>0.883</b>   | 0.976          |
| 3,4-dimethylbenzaldehyde                                                                                                                                                                                                                      | 24.4                     | 23.4                      | <b>24.3</b> | 24.8 | 0.461                   | <b>0.840</b>   | 0.955          |
| 3,5-dimethylbenzaldehyde                                                                                                                                                                                                                      | 27.8                     | 29.5                      | <b>26.8</b> | 25.4 | 0.367                   | <b>0.764</b>   | 0.972          |
| 1,2-diformylbenzene                                                                                                                                                                                                                           | 23.0                     | 24.0                      | <b>24.3</b> | 25.2 | 0.890                   | <b>0.981</b>   | 1.000          |
| 2-acetylbenzaldehyde <sup>a</sup>                                                                                                                                                                                                             | 17.0                     | 13.4                      | <b>12.3</b> | 12.7 | 0.795                   | <b>0.953</b>   | 0.990          |
| 1,2-diacetylbenzene <sup>a</sup>                                                                                                                                                                                                              | < 1.2                    | 2.7                       | <b>0.38</b> | 0.26 | - <sup>b</sup>          | - <sup>b</sup> | - <sup>b</sup> |
| <b>Comments</b><br><sup>a</sup> Optimized (or assigned) values of $R_{\text{C(O)H}}(\Phi)$ for -C(O)H groups are also assumed to apply to -C(O)CH <sub>3</sub> groups in these compounds; <sup>b</sup> Not applicable to 1,2-diacetylbenzene. |                          |                           |             |      |                         |                |                |

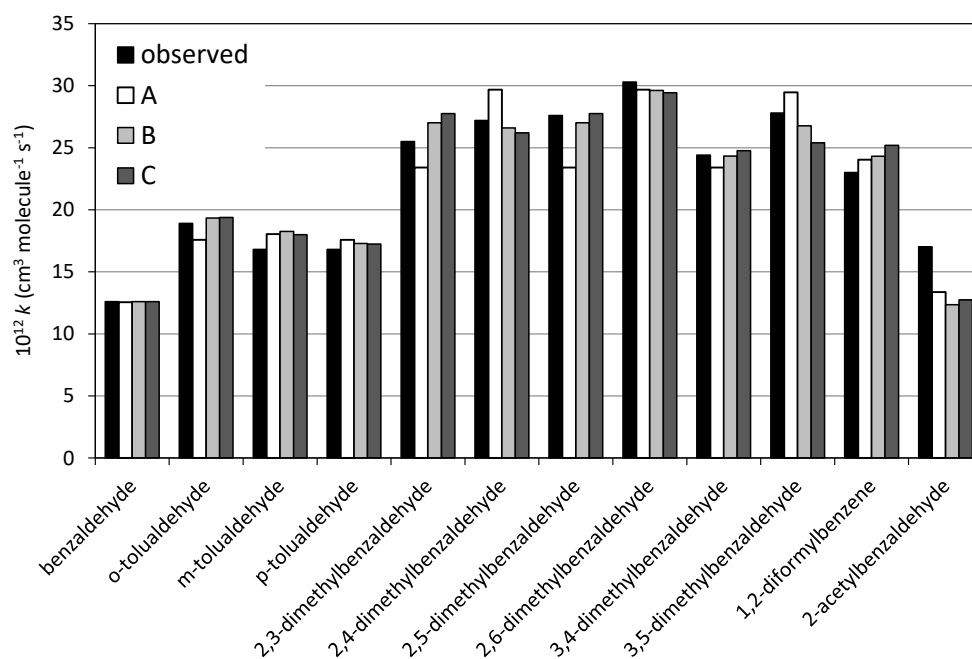

**Figure S3.** Comparison of observed (recommended) rate coefficients at 298 K for the reactions of OH with benzaldehyde and related compounds, with those estimated in the present work.

## S5 OH + aromatic SAR application examples for 298 K

Calculated rate coefficients and branching ratios at 298 K are presented for selected example VOCs.

### Example A: toluene

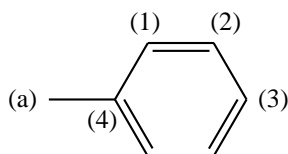

Partial rate coefficients (in units  $10^{-12} \text{ cm}^3 \text{ molecule}^{-1} \text{ s}^{-1}$ ):

$$(1) k_{\text{arom}} \times F(o-) \times 2 = 0.2 \times 7.3 \times 2 = \mathbf{2.920}$$

$$(2) k_{\text{arom}} \times F(m-) \times 2 = 0.2 \times 1.4 \times 2 = \mathbf{0.560}$$

$$(2) k_{\text{arom}} \times F(p-) = 0.2 \times 7.3 = \mathbf{1.460}$$

$$(4) k_{\text{ipso}} = \mathbf{0.280}$$

$$(a) k_{\text{prim}} \times F(-\text{Ph1}) = 0.13 \times 2.7 = \mathbf{0.351}$$

Total calculated rate coefficient:  $5.57 \times 10^{-12} \text{ cm}^3 \text{ molecule}^{-1} \text{ s}^{-1}$

Preferred (observed) rate coefficient:  $5.60 \times 10^{-12} \text{ cm}^3 \text{ molecule}^{-1} \text{ s}^{-1}$

Calculated attack distribution: 0.524 (1): 0.101 (2): 0.262 (3): 0.050 (4): 0.063 (a)

### Example B: *p*-xylene

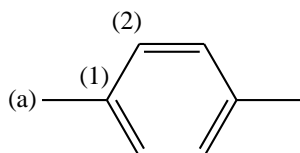

Partial rate coefficients (in units  $10^{-12} \text{ cm}^3 \text{ molecule}^{-1} \text{ s}^{-1}$ ):

$$(1) k_{\text{ipso}} \times F(p-) \times 2 = 0.28 \times 7.3 \times 2 = \mathbf{4.088}$$

$$(2) k_{\text{arom}} \times F(o-, m-) \times 4 = 0.2 \times 10.5 \times 4 = \mathbf{8.400}$$

$$(a) k_{\text{prim}} \times F(-\text{Ph1}) \times \exp(140/T) \times 2 = 0.13 \times 2.7 \times 1.6 \times 2 = \mathbf{1.123}$$

Total calculated rate coefficient:  $1.36 \times 10^{-11} \text{ cm}^3 \text{ molecule}^{-1} \text{ s}^{-1}$

Preferred (observed) rate coefficient:  $1.38 \times 10^{-11} \text{ cm}^3 \text{ molecule}^{-1} \text{ s}^{-1}$

Calculated attack distribution: 0.300 (1): 0.617 (2): 0.083 (a)

### Example C: 1,2,4-trimethylbenzene

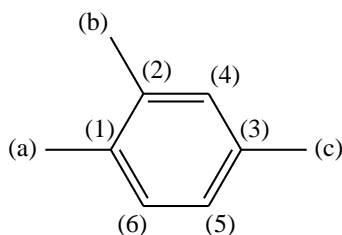

Partial rate coefficients (in units  $10^{-12} \text{ cm}^3 \text{ molecule}^{-1} \text{ s}^{-1}$ ):

- (1)  $k_{\text{ipso}} \times F(o-,p-) = 0.28 \times 34 = \mathbf{9.520}$   
 (2)  $k_{\text{ipso}} \times F(o-,m-) = 0.28 \times 10.5 = \mathbf{2.940}$   
 (3)  $k_{\text{ipso}} \times F(m-,p-) = 0.28 \times 10.5 = \mathbf{2.940}$   
 (4)  $k_{\text{arom}} \times F(o-,o-,m-) = 0.2 \times 28 = \mathbf{5.600}$   
 (5)  $k_{\text{arom}} \times F(o-,m-,p-) = 0.2 \times 28 = \mathbf{5.600}$   
 (6)  $k_{\text{arom}} \times F(o-,m-,m-) = 0.2 \times 11 = \mathbf{2.200}$   
 (a)  $k_{\text{prim}} \times F(-\text{Ph1}) \times [\exp(140/T)]^2 = 0.13 \times 2.7 \times 1.6^2 = \mathbf{0.899}$   
 (b)  $k_{\text{prim}} \times F(-\text{Ph1}) \times \exp(140/T) = 0.13 \times 2.7 \times 1.6 = \mathbf{0.562}$   
 (c)  $k_{\text{prim}} \times F(-\text{Ph1}) \times \exp(140/T) = 0.13 \times 2.7 \times 1.6 = \mathbf{0.562}$

Total calculated rate coefficient:  $3.08 \times 10^{-11} \text{ cm}^3 \text{ molecule}^{-1} \text{ s}^{-1}$

Preferred (observed) rate coefficient:  $3.21 \times 10^{-11} \text{ cm}^3 \text{ molecule}^{-1} \text{ s}^{-1}$

Calculated attack distribution: 0.309 (1): 0.095 (2): 0.095 (3): 0.182 (4): 0.182 (5): 0.071 (6)  
: 0.029 (a): 0.018 (b): 0.018(c)

#### Example D: *p*-cymene

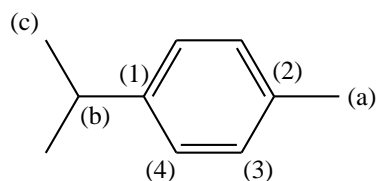

Partial rate coefficients (in units  $10^{-12} \text{ cm}^3 \text{ molecule}^{-1} \text{ s}^{-1}$ ):

- (1)  $k_{\text{ipso}} \times F(p-) = 0.28 \times 7.3 = \mathbf{2.044}$   
 (2)  $k_{\text{ipso}} \times F(p-) \times R_{i\text{-pr}}(p-) = 0.28 \times 7.3 \times 0.83 = \mathbf{1.697}$   
 (3)  $k_{\text{arom}} \times F(o-,m-) \times 2 = 0.2 \times 10.5 \times 2 = \mathbf{4.200}$   
 (4)  $k_{\text{arom}} \times F(o-,m-) \times R_{i\text{-pr}}(o-) \times 2 = 0.2 \times 10.5 \times 0.83 \times 2 = \mathbf{3.486}$   
 (a)  $k_{\text{prim}} \times F(-\text{Ph1}) \times \exp(140/T) = 0.13 \times 2.7 \times 1.6 = \mathbf{0.562}$   
 (b)  $k_{\text{tert}} \times F(-\text{Ph2}) \times \exp(140/T) \times F(-\text{CH}_3) \times F(-\text{CH}_3) = 1.49 \times 1.0 \times 1.6 \times 1.0 \times 1.0 = \mathbf{2.384}$   
 (c)  $k_{\text{prim}} \times F(-\text{CH}) \times 2 = 0.13 \times 1.35 \times 2 = \mathbf{0.351}$

Total calculated rate coefficient:  $1.47 \times 10^{-11} \text{ cm}^3 \text{ molecule}^{-1} \text{ s}^{-1}$

Preferred (observed) rate coefficient:  $1.47 \times 10^{-11} \text{ cm}^3 \text{ molecule}^{-1} \text{ s}^{-1}$

Calculated attack distribution: 0.139 (1): 0.115 (2): 0.285 (3): 0.237 (4): 0.038 (a): 0.162 (b)  
: 0.024 (c)

### Example E: 3,5-dimethylphenol

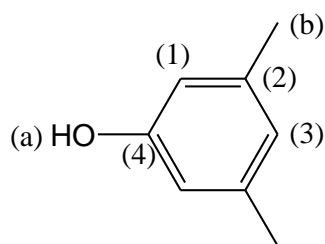

Partial rate coefficients (in units  $10^{-12} \text{ cm}^3 \text{ molecule}^{-1} \text{ s}^{-1}$ ):

$$(1) k_{\text{arom}} \times F(o-, o-, p-) \times R_{\text{OH}}(o-) \times 2 = 0.2 \times 87 \times 2.6 \times 2 = \mathbf{90.480}$$

$$(2) k_{\text{ipso}} \times F(m-, m-) \times R_{\text{OH}}(m-) \times 2 = 0.28 \times 7.5 \times 2.4 \times 2 = \mathbf{10.080}$$

$$(3) k_{\text{arom}} \times F(o-, o-, p-) \times R_{\text{OH}}(p-) = 0.2 \times 87 \times 2.6 = \mathbf{45.240}$$

$$(4) k_{\text{ipso}} \times F(m-, m-) \times R_{\text{OH}}(\text{ipso-}) = 0.28 \times 7.5 \times 2.4 = \mathbf{5.040}$$

$$(a) k_{\text{abs(Ph-OH)}} = \mathbf{2.600}$$

$$(b) k_{\text{prim}} \times F(-\text{Ph1}) \times 2 = 0.13 \times 2.7 \times 2 = \mathbf{0.702}$$

$$\text{Total calculated rate coefficient: } 1.54 \times 10^{-10} \text{ cm}^3 \text{ molecule}^{-1} \text{ s}^{-1}$$

$$\text{Preferred (observed) rate coefficient: } 1.13 \times 10^{-10} \text{ cm}^3 \text{ molecule}^{-1} \text{ s}^{-1}$$

$$\text{Calculated attack distribution: } 0.587 (1): 0.065 (2): 0.293 (3): 0.033 (4): 0.017 (a): 0.005 (b)$$

### Example F: 3-methyl-1,2-dihydroxybenzene

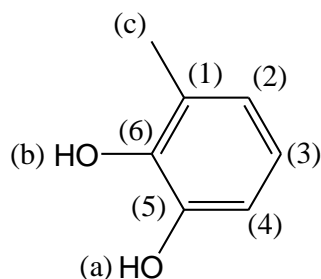

Partial rate coefficients (in units  $10^{-12} \text{ cm}^3 \text{ molecule}^{-1} \text{ s}^{-1}$ ):

$$(1) k_{\text{ipso}} \times F(o-, m-) \times R_{\text{OH}}(o-) \times R_{\text{OH}}(m-) = 0.28 \times 10.5 \times 2.6 \times 2.4 = \mathbf{18.346}$$

$$(2) k_{\text{arom}} \times F(o-, m-, p-) \times R_{\text{OH}}(m-) \times R_{\text{OH}}(p-) = 0.2 \times 28 \times 2.4 \times 2.6 = \mathbf{34.944}$$

$$(3) k_{\text{arom}} \times F(m-, m-, p-) \times R_{\text{OH}}(m-) \times R_{\text{OH}}(p-) = 0.2 \times 11 \times 2.4 \times 2.6 = \mathbf{13.728}$$

$$(4) k_{\text{arom}} \times F(o-, m-, p-) \times R_{\text{OH}}(o-) \times R_{\text{OH}}(m-) = 0.2 \times 28 \times 2.6 \times 2.4 = \mathbf{34.944}$$

$$(5) k_{\text{ipso}} \times F(o-, m-) \times R_{\text{OH}}(\text{ipso-}) \times R_{\text{OH}}(o-) = 0.28 \times 10.5 \times 2.4 \times 2.6 = \mathbf{18.346}$$

$$(6) k_{\text{ipso}} \times F(o-, o-) \times R_{\text{OH}}(\text{ipso-}) \times R_{\text{OH}}(o-) = 0.28 \times 34 \times 2.4 \times 2.6 = \mathbf{59.405}$$

$$(a) k_{\text{abs(Ph-OH)}} = \mathbf{2.600}$$

$$(b) k_{\text{abs(Ph-OH)}} = \mathbf{2.600}$$

$$(c) k_{\text{prim}} \times F(-\text{Ph1}) = 0.13 \times 2.7 = \mathbf{0.351}$$

|                                               |                                                                                                      |
|-----------------------------------------------|------------------------------------------------------------------------------------------------------|
| <u>Total calculated rate coefficient:</u>     | $1.85 \times 10^{-10} \text{ cm}^3 \text{ molecule}^{-1} \text{ s}^{-1}$                             |
| <u>Preferred (observed) rate coefficient:</u> | $2.0 \times 10^{-10} \text{ cm}^3 \text{ molecule}^{-1} \text{ s}^{-1}$                              |
| <u>Calculated attack distribution:</u>        | 0.099 (1): 0.189 (2): 0.074 (3): 0.189 (4): 0.099 (5): 0.321 (6):<br>0.014 (a): 0.014 (b): 0.002 (c) |

### **Example G: 2,6-dimethylbenzaldehyde**

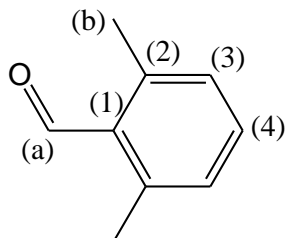

Partial rate coefficients (in units  $10^{-12} \text{ cm}^3 \text{ molecule}^{-1} \text{ s}^{-1}$ ):

- (1)  $k_{\text{ipso}} \times F(o-,o-) \times R_{\text{C(O)H}}(\text{ipso-}) = 0.28 \times 34 \times 0.096 = \mathbf{0.914}$
- (2)  $k_{\text{ipso}} \times F(o-,m) \times R_{\text{C(O)H}}(o-) \times 2 = 0.28 \times 10.5 \times 0.096 \times 2 = \mathbf{0.564}$
- (3)  $k_{\text{arom}} \times F(o-,m-,p-) \times R_{\text{C(O)H}}(m-) \times 2 = 0.2 \times 28 \times 0.096 \times 2 = \mathbf{1.075}$
- (4)  $k_{\text{arom}} \times F(m-,m-,p-) \times R_{\text{C(O)H}}(p-) = 0.2 \times 11 \times 0.096 = \mathbf{0.211}$
- (a)  $k_{\text{abs(Ph-C(O)H)}} \times [\exp(115/T)]^2 = 12.1 \times 1.47^2 = \mathbf{26.147}$
- (b)  $k_{\text{prim}} \times F(-\text{Ph1}) \times 2 = 0.13 \times 2.7 \times 2 = \mathbf{0.702}$

|                                               |                                                                          |
|-----------------------------------------------|--------------------------------------------------------------------------|
| <u>Total calculated rate coefficient:</u>     | $2.96 \times 10^{-11} \text{ cm}^3 \text{ molecule}^{-1} \text{ s}^{-1}$ |
| <u>Preferred (observed) rate coefficient:</u> | $3.03 \times 10^{-11} \text{ cm}^3 \text{ molecule}^{-1} \text{ s}^{-1}$ |
| <u>Calculated attack distribution:</u>        | 0.031 (1): 0.019 (2): 0.036 (3): 0.007 (4): 0.883 (a): 0.024 (b)         |

### **Example H: 3-methyl-2-nitrophenol**

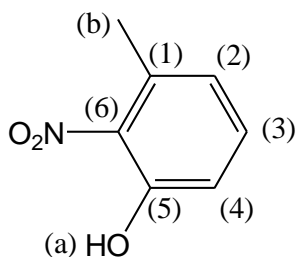

Partial rate coefficients (in units  $10^{-12} \text{ cm}^3 \text{ molecule}^{-1} \text{ s}^{-1}$ ):

- (1)  $k_{\text{ipso}} \times F(o-,m-) \times R_{\text{NO}_2}(o-) \times R_{\text{OH}}(m-) = 0.28 \times 10.5 \times 0.024 \times 2.4 = \mathbf{0.169}$
- (2)  $k_{\text{arom}} \times F(o-,m-,p-) \times R_{\text{NO}_2}(m-) \times R_{\text{OH}}(p-) = 0.2 \times 28 \times 0.070 \times 2.6 = \mathbf{1.019}$
- (3)  $k_{\text{arom}} \times F(m-,m-,p-) \times R_{\text{OH}}(m-) \times R_{\text{NO}_2}(p-) = 0.2 \times 11 \times 2.4 \times 0.024 = \mathbf{0.127}$
- (4)  $k_{\text{arom}} \times F(o-,m-,p-) \times R_{\text{OH}}(o-) \times R_{\text{NO}_2}(m-) = 0.2 \times 28 \times 2.6 \times 0.070 = \mathbf{1.019}$
- (5)  $k_{\text{ipso}} \times F(o-,m-) \times R_{\text{OH}}(\text{ipso-}) \times R_{\text{NO}_2}(o-) = 0.28 \times 10.5 \times 2.4 \times 0.024 = \mathbf{0.169}$

$$(6) k_{\text{ipso}} \times F(o-,o-) \times R_{\text{NO}_2}(\text{ipso-}) \times R_{\text{OH}}(o-) = 0.28 \times 34 \times 0.070 \times 2.6 = \mathbf{1.733}$$

$$(a) k_{\text{abs(-OH)}} = \mathbf{0.14}$$

$$(c) k_{\text{prim}} \times F(-\text{Ph1}) = 0.13 \times 2.7 = \mathbf{0.351}$$

$$\text{Total calculated rate coefficient: } 4.73 \times 10^{-12} \text{ cm}^3 \text{ molecule}^{-1} \text{ s}^{-1}$$

$$\text{Preferred (observed) rate coefficient: } 3.69 \times 10^{-12} \text{ cm}^3 \text{ molecule}^{-1} \text{ s}^{-1}$$

$$\text{Calculated attack distribution: } 0.036 (1): 0.216 (2): 0.027 (3): 0.216 (4): 0.036 (5): 0.367 (6): \\ 0.030 (a): 0.074 (b)$$

## S6 Toluene oxidation sequence example calculations

The reactions steps in the oxidation of toluene to first generation products are presented, with illustration of the rate coefficients and branching ratios for the steps involved.

### 1) Calculated initial attack distribution (see Sect. S5, Example A)

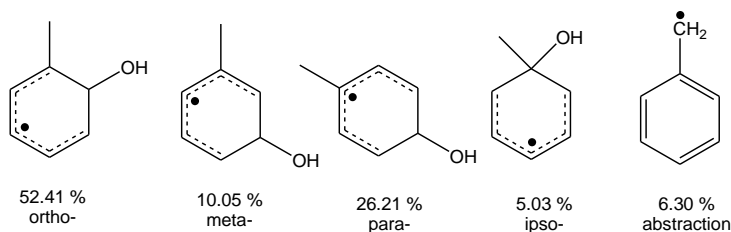

### 2) Reaction sequences following reaction with OH

a) ortho- OH addition ( $k_{\text{abs-O}_2}$  and  $k_{\text{add-O}_2}$  in units  $10^{-17} \text{ cm}^3 \text{ molecule}^{-1} \text{ s}^{-1}$ )

$$k_{\text{abs-O}_2} = 11.4$$

$$k_{\text{add-O}_2(1)} = k_{\text{add-O}_2}^\circ \times F_5(-\text{alkyl}) = 5.0 \times 6.5 = 32.5$$

$$k_{\text{add-O}_2(2)} = k_{\text{add-O}_2}^\circ \times F_1(-\text{alkyl}) = 5.0 \times 1.0 = 5.0$$

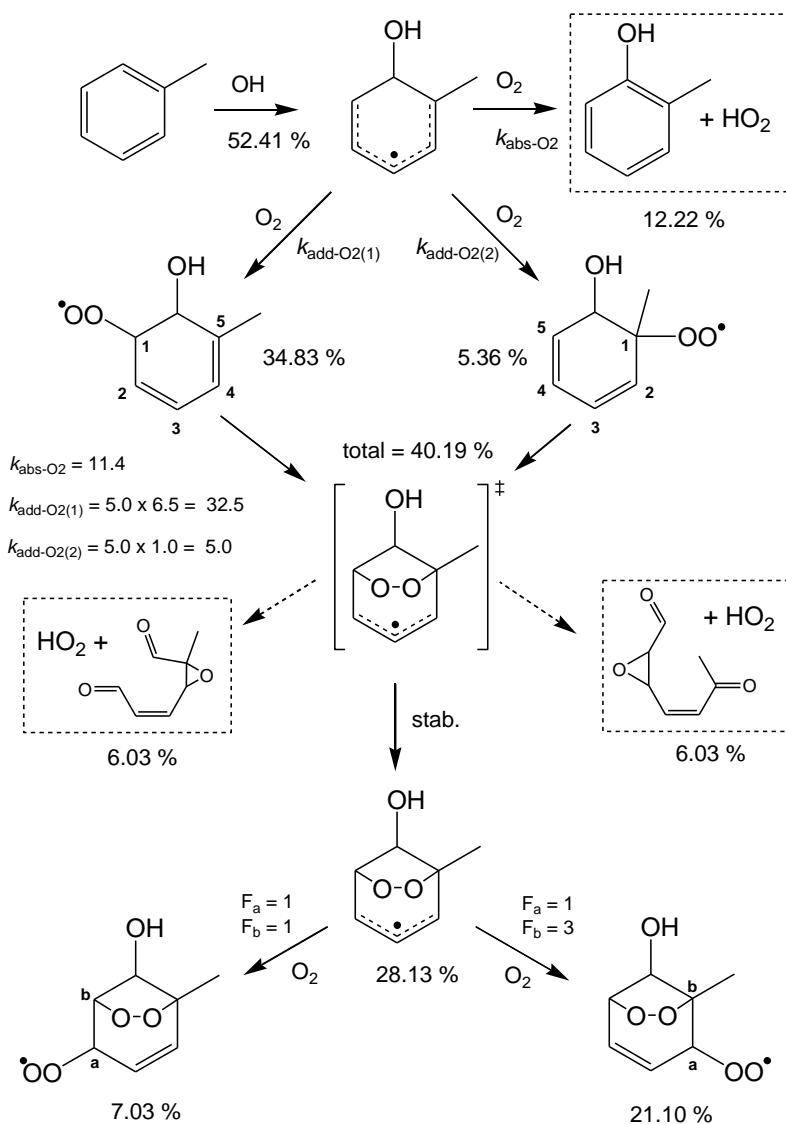

b) *meta*-OH addition ( $k_{\text{abs-O}_2}$  and  $k_{\text{add-O}_2}$  in units  $10^{-17} \text{ cm}^3 \text{ molecule}^{-1} \text{ s}^{-1}$ )

$$k_{\text{abs-O}_2} = \mathbf{11.4}$$

$$k_{\text{add-O}_2(1)} = k_{\text{add-O}_2}^{\circ} \times F_4(-\text{alkyl}) = 5.0 \times 2.0 = \mathbf{10.0}$$

$$k_{\text{add-O}_2(2)} = k_{\text{add-O}_2}^{\circ} \times F_2(-\text{alkyl}) = 5.0 \times 2.0 = \mathbf{10.0}$$

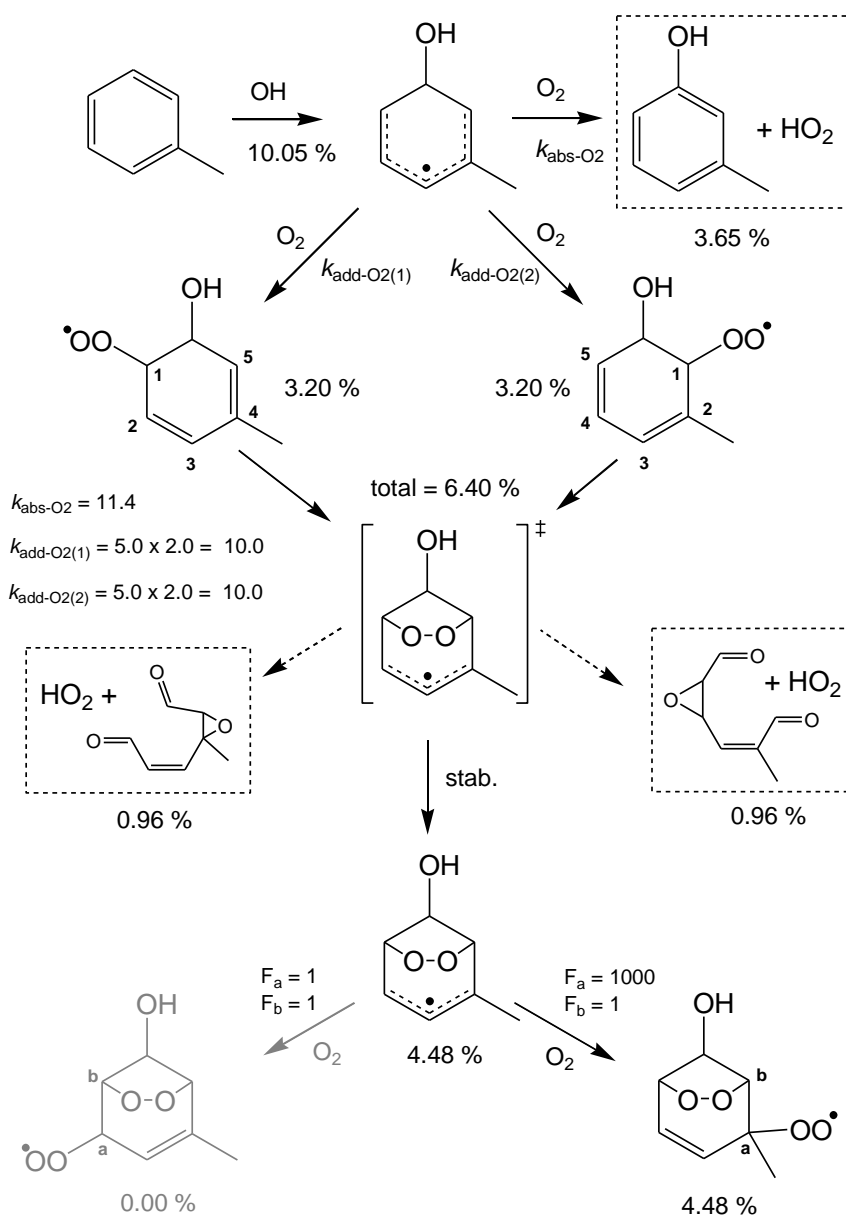

c) para- OH addition ( $k_{\text{abs-O}_2}$  and  $k_{\text{add-O}_2}$  in units  $10^{-17} \text{ cm}^3 \text{ molecule}^{-1} \text{ s}^{-1}$ )

$$k_{\text{abs-O}_2} = \mathbf{11.4}$$

$$k_{\text{add-O}_2(1)} = k_{\text{add-O}_2}^{\circ} \times F_3(-\text{alkyl}) = 5.0 \times 8.0 = \mathbf{40.0}$$

$$k_{\text{add-O}_2(2)} = k_{\text{add-O}_2}^{\circ} \times F_3(-\text{alkyl}) = 5.0 \times 8.0 = \mathbf{40.0}$$

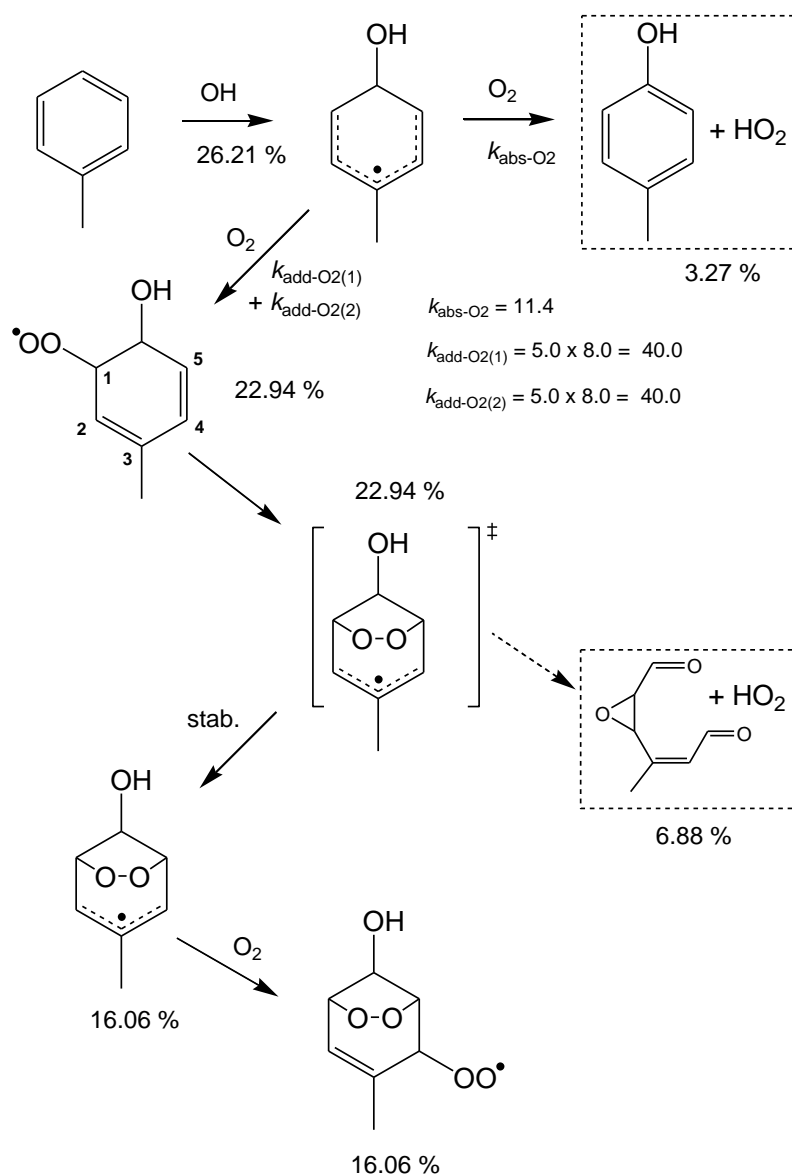

d) ipso- OH addition ( $k_{\text{abs-O}_2}$  and  $k_{\text{add-O}_2}$  in units  $10^{-17} \text{ cm}^3 \text{ molecule}^{-1} \text{ s}^{-1}$ )

$k_{\text{abs-O}_2} = 0$  (no  $\alpha$ - H)

$k_{\text{add-O}_2(1)} = k^{\circ}_{\text{add-O}_2} = 5.0$

$k_{\text{add-O}_2(2)} = k^{\circ}_{\text{add-O}_2} = 5.0$

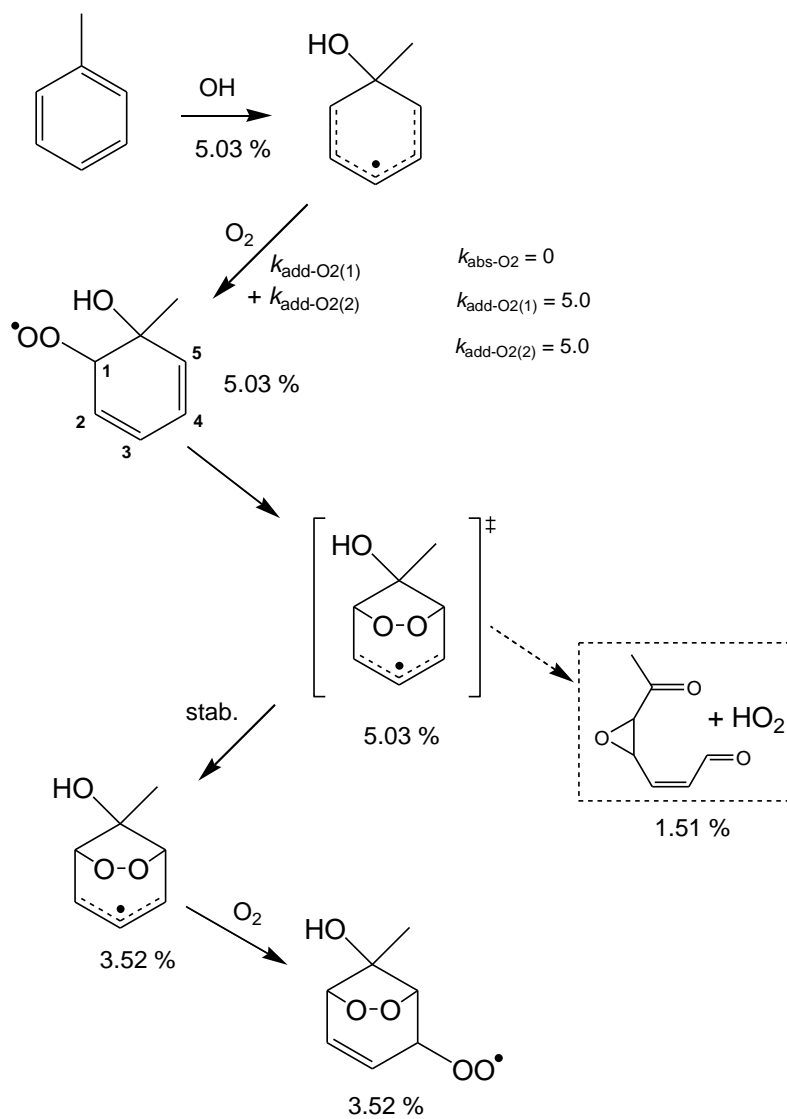

e) Abstraction

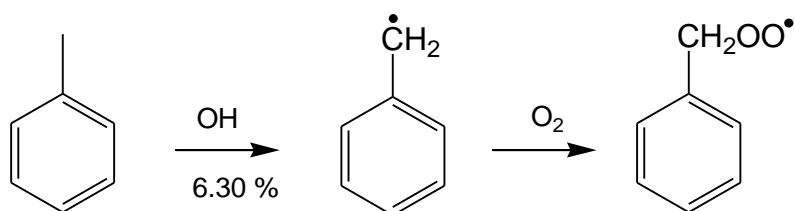

### 3) Product formation from exclusive reaction of peroxy radicals with NO

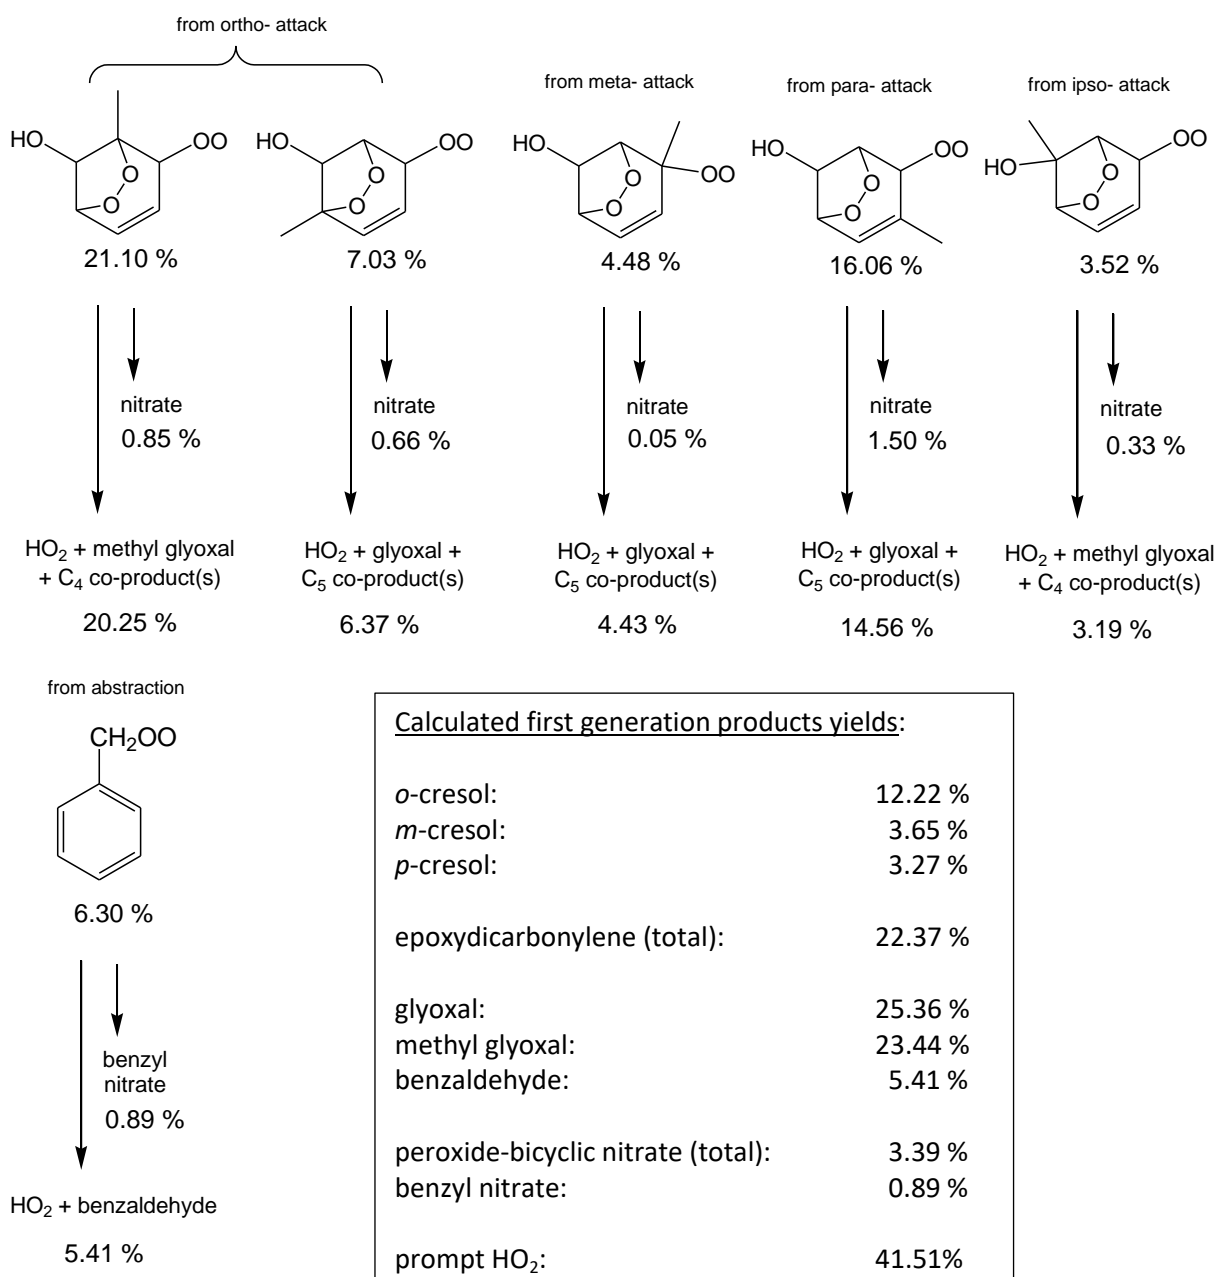

### References

- Atkinson, R. and Aschmann, S. M.: Products of the gas-phase reactions of aromatic hydrocarbons: Effect of NO<sub>2</sub> concentration, *Int. J. Chem. Kinet.* 26, 929–944, 1994.
- Atkinson, R., Aschmann, S. M. and Arey, J.: Reactions of OH and NO<sub>3</sub> radicals with phenol, cresols, and 2-nitrophenol at 296 ± 2 K, *Environ. Sci. Technol.*, 26, 1397-1403, 1992.
- Berndt, T. and Böge, O.: Formation of phenol and carbonyls from the atmospheric reaction of OH radicals with benzene, *Phys. Chem. Chem. Phys.*, 8, 1205-1214, 2006.
- Coeur-Tourneur, C., Henry, F., Janquin, M. -A. and Brutier, L.: Gas-phase reaction of hydroxyl radicals with *m*-, *o*- and *p*-cresol, *Int. J. Chem. Kinet.*, 38, 553-562, 2006.

Elrod, M. J.: Kinetics study of the aromatic bicyclic peroxy radical + NO reaction: overall rate constant and nitrate product yield measurements, *J. Phys. Chem. A*, 115, 8125–8130, 2011.

Iuga, C., Galano, A. and Vivier-Bunge, A.: Theoretical investigation of the OH-initiated oxidation of benzaldehyde in the troposphere, *ChemPhysChem*, 9, 1453-1459, 2008.

Klotz, B., Sørensen, S., Barnes, I., Becker, K.H., Etzkorn, T., Volkamer, R., Platt, U., Wirtz, K. and Martín-Reviejo, M.: Atmospheric oxidation of toluene in a large volume outdoor photoreactor: in situ determination of ring-retaining product yields, *J. Phys. Chem. A*, 102, 10289-10299, 1998.

Nehr, S, Bohn, B., Fuchs, H., Hofzumahaus, A. and Wahner, A: HO<sub>2</sub> formation from the OH + benzene reaction in the presence of O<sub>2</sub>, *Phys. Chem. Chem. Phys.*, 13, 10699–10708, 2011.

Nehr, S, Bohn, B. and Wahner, A: Prompt HO<sub>2</sub> formation following the reaction of OH with aromatic compounds under atmospheric conditions, *J. Phys. Chem. A*, 116, 6015-6026, 2012.

Nishino, N., Arey, J. and Atkinson, R: Formation yields of glyoxal and methylglyoxal from the gas-phase OH radical-initiated reactions of toluene, xylenes, and trimethylbenzenes as a function of NO<sub>2</sub> concentration, *J. Phys. Chem. A*, 114, 10140–10147, 2010.

Noda, J., Volkamer, R., and Molina, M.J.: Dealkylation of alkylbenzenes: a significant pathway in the toluene, *o*-, *m*-, and *p*-xylene + OH reaction, *J. Phys. Chem. A*, 113, 9658-9666, 2009.

Olariu, R. I., Klotz, B., Barnes, I., Becker, K. H., and Mocanu, R.: FT-IR study of the ring-retaining products from the reaction of OH radicals with phenol, *o*-, *m*-, and *p*-cresol, *Atmos. Environ.*, 36 (22), 3685-3697, 2002.

Rickard, A. R., Wyche, K. P., Metzger, A., Monks, P. S., Ellis, A. M., Dommen, J., Baltensperger, U., Jenkin, M. E. and Pilling M. J.: Gas phase precursors to anthropogenic secondary organic aerosol: using the Master Chemical Mechanism to probe detailed observations of 1,3,5-trimethylbenzene photo-oxidation, *Atmos. Environ.*, 44, 5423-5433, 2010.

Smith, D. F., McIver, C. D., and Kleindienst, T. E.: Primary product distribution from the reaction of hydroxyl radicals with toluene at ppb NO<sub>x</sub> mixing ratios, *J. Atmos. Chem.* 30, 209–228, 1998.

Smith, D. F., Kleindienst, T. E., and McIver, C. D.: Primary product distributions from the reaction of OH with *m*-, *p*-xylene, 1,2,4- and 1,3,5-trimethyl benzene, *J. Atmos. Chem.*, 34, 339-364, 1999.

Volkamer, R., Platt, U., and Wirtz, K.: Primary and secondary glyoxal formation from aromatics: experimental evidence for the bicycloalkyl-radical pathway from benzene, toluene and *p*-xylene, *J. Phys. Chem. A*, 105, 7865–7874, 2001.

Volkamer, R., Klotz, B., Barnes, I., Imamura, T., Wirtz, K., Washida, N., Becker, K. H., and Platt, U.: OH-initiated oxidation of benzene – Part I. Phenol formation under atmospheric conditions, *Phys. Chem. Chem. Phys.*, 4 (9), 1598–1610, 2002.
